# Supplementary material
Source: PubMed Central journal article supplement (PMC3532710)

# Supplemental Figure 1

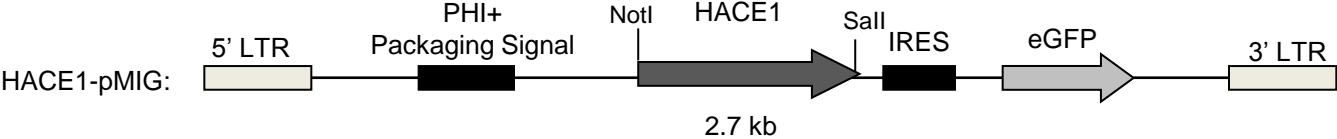

Supplement: mmc1.pdf [file mmc1.pdf]

# Supplemental Figure 2

**A**

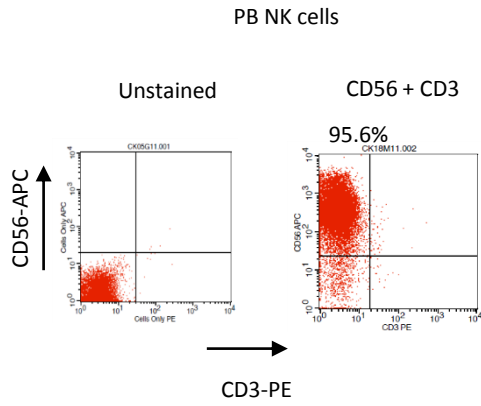

**B**

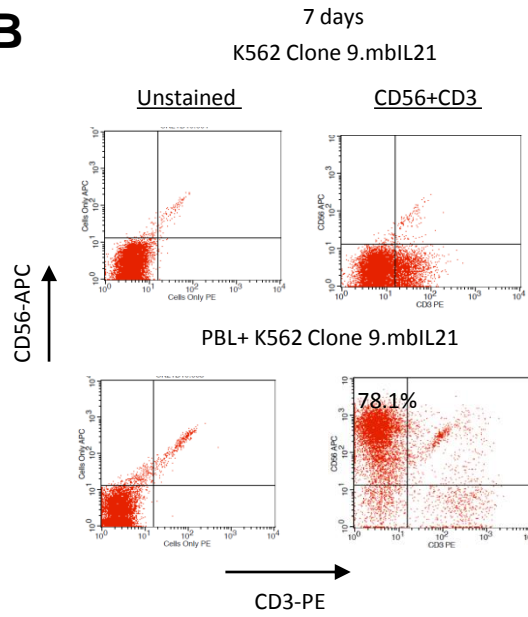

**C**

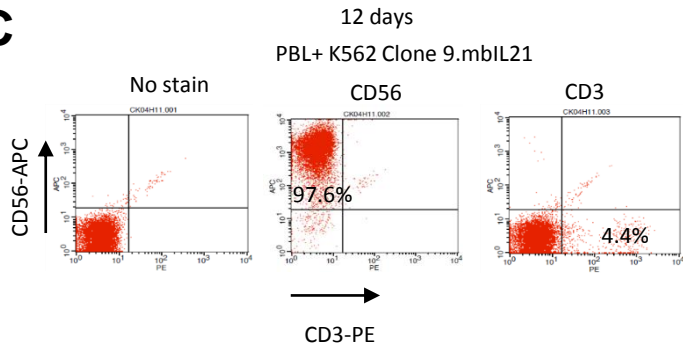

**D**

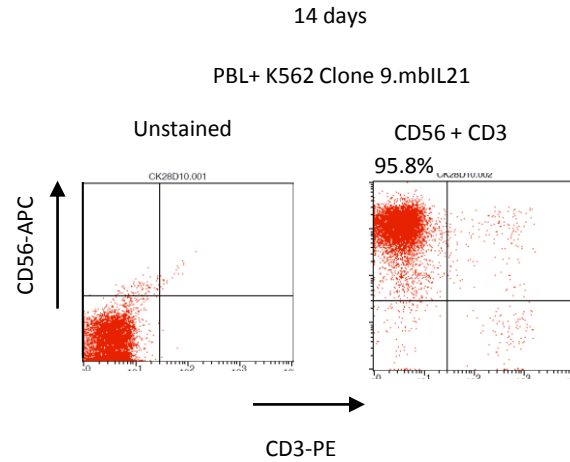

Supplement: mmc2.pdf [file mmc2.pdf]

# Supplemental Figure 3

**A**

KAI3

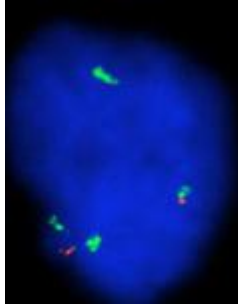

**B**

NK92

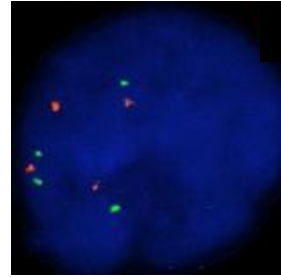

HACE1=6q21

CEP 6

Supplement: mmc3.pdf [file mmc3.pdf]
